# Supplementary material
Source: publisher site journal article supplement (https://www.dovepress.com/article/233706)
Supplement: Supplementary file 1 [file get_supplementary_file.php]

**Available Data for Access to Critical Private Variable via Public Method in Database**

| **No.** | **Numerical value** | | | **Coded linguistic variable** | | |
| --- | --- | --- | --- | --- | --- | --- |
| **Probability** | **Severity** | **Security Risk** | **Probability** | **Severity** | **Security Risk** |
| **1** | 3 (Even) | 3 (Medium) | 3 (Significant) | 0.500 | 5.000 | 0.640 |
| **2** | 2 (Unlikely) | 3 (Medium) | 2 (Medium) | 0.275 | 5.000 | 0.355 |
| **3** | 2(Unlikely) | 2 (Little) | 1 (Low) | 0.275 | 2.750 | 0.165 |
| **4** | 3 (Even) | 2 (Little) | 2 (Medium) | 0.500 | 2.750 | 0.355 |
| **5** | 4 (Likely) | 3 (Medium) | 3 (Significant) | 0.725 | 5.000 | 0.640 |
| **6** | 3 (Even) | 2 (Little) | 2 (Medium) | 0.500 | 2.750 | 0.355 |
| **7** | 1 (Very Unlikely) | 1 (Very Little) | 1 (Low) | 0.125 | 1.250 | 0.165 |
| **8** | 3 (Even) | 2 (Little) | 2 (Medium) | 0.500 | 2.750 | 0.355 |
| **9** | 2 (Unlikely) | 4 (High) | 3 (Significant) | 0.275 | 7.250 | 0.640 |
| **10** | 3 (Even) | 5 (Catastrophic) | 4 (High) | 0.500 | 8.750 | 0.830 |
| **11** | 4 (Likely) | 4 (High) | 4 (High) | 0.725 | 7.250 | 0.830 |
| **12** | 3 (Even) | 4 (High) | 4 (High) | 0.500 | 7.250 | 0.830 |
| **13** | 1 (Very Unlikely) | 4 (High) | 3 (Significant) | 0.125 | 7.250 | 0.640 |
| **14** | 3 (Even) | 4 (High) | 4 | 0.500 | 7.250 | 0.830 |
| **15** | 3 (Even) | 2 (Little) | 2 (Medium) | 0.500 | 2.750 | 0.355 |
| **16** | 4 (Very Likely) | 5 (Catastrophic) | 4 (High) | 0.725 | 8.750 | 0.830 |
| **17** | 5 (Very Likely) | 3 (Medium) | 4 (High) | 0.875 | 5.000 | 0.830 |
| **18** | 3 (Even) | 3 (Medium) | 3 (Significant) | 0.500 | 5.000 | 0.640 |
| **19** | 4 (Likely) | 4 (High) | 4 (High) | 0.725 | 7.250 | 0.830 |
| **20** | 4 (Likely) | 4 (High) | 4 (High) | 0.725 | 7.250 | 0.830 |
| **21** | 4 (Likely) | 4 (High) | 4 (High) | 0.725 | 7.250 | 0.830 |
| **22** | 5 (Very Likely) | 5 (Catastrophic) | 4 (High) | 0.875 | 8.750 | 0.830 |
| **23** | 5 (Very Likely) | 5 (Catastrophic) | 4 (High) | 0.875 | 8.750 | 0.830 |
| **24** | 4 (Likely) | 3 (Medium) | 3 (Significant) | 0.725 | 5.000 | 0.640 |
| **25** | 4 (Likely) | 4 (High) | 4 (High) | 0.725 | 7.250 | 0.830 |
| **26** | 3 (Even) | 5 (Catastrophic) | 4 (High) | 0.500 | 8.750 | 0.830 |
| **27** | 2 (Unlikely) | 1 (Very Little) | 1 (Low) | 0.275 | 1.250 | 0.165 |
| **28** | 3 (Even) | 3 (Medium) | 3 (Significant) | 0.500 | 5.000 | 0.640 |
| **29** | 4 (Likely) | 5 (Catastrophic) | 4 (High) | 0.725 | 8.750 | 0.830 |
| **30** | 4 (Likely) | 2 (Little) | 3 (Significant) | 0.725 | 2.750 | 0.640 |
| **31** | 3 (Even) | 5 (Catastrophic) | 4 (High) | 0.500 | 8.750 | 0.830 |
| **32** | 3 (Even) | 4 (High) | 4 (High) | 0.500 | 7.250 | 0.830 |
| **33** | 3 (Even) | 3 (Medium) | 3 (Significant) | 0.500 | 5.000 | 0.640 |
| **34** | 4 (Likely) | 2 (Little) | 3 (Significant) | 0.725 | 2.750 | 0.640 |
| **35** | 4 (Likely) | 3 (Medium) | 3 (Significant) | 0.725 | 5.000 | 0.640 |
| **36** | 5 (Very Likely) | 2 (Little) | 3 (Significant) | 0.875 | 2.750 | 0.640 |
| **37** | 4 (Likely) | 3 (Medium) | 3 (Significant) | 0.725 | 5.000 | 0.640 |
| **38** | 3 (Even) | 4 (High) | 4 (High) | 0.500 | 7.250 | 0.830 |
| **39** | 2 (Unlikely) | 1 (Very Little) | 1 (Low) | 0.275 | 1.250 | 0.165 |
| **40** | 1 (Very Unlikely) | 3 (Medium) | 2 (Medium) | 0.125 | 5.000 | 0.355 |
| **41** | 5 (Very Likely) | 2 (Little) | 3 (Significant) | 0.875 | 2.750 | 0.640 |
| **42** | 2 (Unlikely) | 2 (Little) | 1 (Low) | 0.275 | 2.750 | 0.165 |
| **43** | 4 (Likely) | 4 (High) | 4 (High) | 0.725 | 7.250 | 0.830 |
| **44** | 3 (Even) | 3 (Medium) | 3 (Significant) | 0.500 | 5.000 | 0.640 |
| **45** | 3 (Even) | 5 (Catastrophic) | 4 (High) | 0.500 | 8.750 | 0.830 |
| **46** | 2 (Unlikely) | 2 (Little) | 1 (Low) | 0.275 | 2.750 | 0.165 |
| **47** | 2 (Unlikely) | 5 (Catastrophic) | 4 (High) | 0.275 | 8.750 | 0.830 |
| **48** | 4 (Likely) | 4 (High) | 4 (High) | 0.725 | 7.250 | 0.830 |
| **49** | 4 (Likely) | 2 (Little) | 3 (Significant) | 0.725 | 2.750 | 0.640 |
| **50** | 5 (Very Likely) | 4 (High) | 4 (High) | 0.875 | 7.250 | 0.830 |
| **51** | 5 (Very Likely) | 5 (Catastrophic) | 4 (High) | 0.875 | 8.750 | 0.830 |

**Available Data for Password in Configuration File in Database**

| **No.** | **Numerical value** | | | **Coded linguistic variable** | | |
| --- | --- | --- | --- | --- | --- | --- |
| **Probability** | **Severity** | **Security Risk** | **Probability** | **Severity** | **Security Risk** |
| **1** | 4 (Likely) | 4 (High) | 4 (High) | 0.725 | 7.250 | 0.830 |
| **2** | 3 (Even) | 4 (High) | 4 (High) | 0.500 | 7.250 | 0.830 |
| **3** | 1 (Very Unlikely) | 4 (High) | 3 (Significant) | 0.125 | 7.250 | 0.640 |
| **4** | 3 (Even) | 4 (High) | 4 | 0.500 | 7.250 | 0.830 |
| **5** | 3 (Even) | 2 (Little) | 2 (Medium) | 0.500 | 2.750 | 0.355 |
| **6** | 4 (Very Likely) | 5 (Catastrophic) | 4 (High) | 0.725 | 8.750 | 0.830 |
| **7** | 4 (Likely) | 4 (High) | 4 (High) | 0.725 | 7.250 | 0.830 |
| **8** | 3 (Even) | 4 (High) | 4 (High) | 0.500 | 7.250 | 0.830 |
| **9** | 2 (Unlikely) | 4 (High) | 3 (Significant) | 0.275 | 7.250 | 0.640 |
| **10** | 3 (Even) | 5 (Catastrophic) | 4 (High) | 0.500 | 8.750 | 0.830 |
| **11** | 4 (Likely) | 4 (High) | 4 (High) | 0.725 | 7.250 | 0.830 |
| **12** | 3 (Even) | 4 (High) | 4 (High) | 0.500 | 7.250 | 0.830 |
| **13** | 1 (Very Unlikely) | 4 (High) | 3 (Significant) | 0.125 | 7.250 | 0.640 |
| **14** | 3 (Even) | 4 (High) | 4 | 0.500 | 7.250 | 0.830 |
| **15** | 3 (Even) | 2 (Little) | 2 (Medium) | 0.500 | 2.750 | 0.355 |
| **16** | 4 (Very Likely) | 5 (Catastrophic) | 4 (High) | 0.725 | 8.750 | 0.830 |
| **17** | 5 (Very Likely) | 3 (Medium) | 4 (High) | 0.875 | 5.000 | 0.830 |
| **18** | 3 (Even) | 3 (Medium) | 3 (Significant) | 0.500 | 5.000 | 0.640 |
| **19** | 4 (Likely) | 4 (High) | 4 (High) | 0.725 | 7.250 | 0.830 |
| **20** | 4 (Likely) | 4 (High) | 4 (High) | 0.725 | 7.250 | 0.830 |
| **21** | 4 (Likely) | 4 (High) | 4 (High) | 0.725 | 7.250 | 0.830 |
| **22** | 5 (Very Likely) | 5 (Catastrophic) | 4 (High) | 0.875 | 8.750 | 0.830 |
| **23** | 5 (Very Likely) | 5 (Catastrophic) | 4 (High) | 0.875 | 8.750 | 0.830 |
| **24** | 4 (Likely) | 3 (Medium) | 3 (Significant) | 0.725 | 5.000 | 0.640 |
| **25** | 4 (Likely) | 4 (High) | 4 (High) | 0.725 | 7.250 | 0.830 |
| **26** | 3 (Even) | 5 (Catastrophic) | 4 (High) | 0.500 | 8.750 | 0.830 |
| **27** | 2 (Unlikely) | 1 (Very Little) | 1 (Low) | 0.275 | 1.250 | 0.165 |
| **28** | 3 (Even) | 3 (Medium) | 3 (Significant) | 0.500 | 5.000 | 0.640 |
| **29** | 4 (Likely) | 5 (Catastrophic) | 4 (High) | 0.725 | 8.750 | 0.830 |
| **30** | 4 (Likely) | 2 (Little) | 3 (Significant) | 0.725 | 2.750 | 0.640 |
| **31** | 3 (Even) | 5 (Catastrophic) | 4 (High) | 0.500 | 8.750 | 0.830 |
| **32** | 3 (Even) | 4 (High) | 4 (High) | 0.500 | 7.250 | 0.830 |
| **33** | 3 (Even) | 3 (Medium) | 3 (Significant) | 0.500 | 5.000 | 0.640 |
| **34** | 4 (Likely) | 2 (Little) | 3 (Significant) | 0.725 | 2.750 | 0.640 |
| **35** | 4 (Likely) | 3 (Medium) | 3 (Significant) | 0.725 | 5.000 | 0.640 |
| **36** | 5 (Very Likely) | 2 (Little) | 3 (Significant) | 0.875 | 2.750 | 0.640 |
| **37** | 4 (Likely) | 3 (Medium) | 3 (Significant) | 0.725 | 5.000 | 0.640 |
| **38** | 3 (Even) | 4 (High) | 4 (High) | 0.500 | 7.250 | 0.830 |
| **39** | 2 (Unlikely) | 1 (Very Little) | 1 (Low) | 0.275 | 1.250 | 0.165 |
| **40** | 1 (Very Unlikely) | 3 (Medium) | 2 (Medium) | 0.125 | 5.000 | 0.355 |
| **41** | 5 (Very Likely) | 2 (Little) | 3 (Significant) | 0.875 | 2.750 | 0.640 |
| **42** | 2 (Unlikely) | 2 (Little) | 1 (Low) | 0.275 | 2.750 | 0.165 |
| **43** | 4 (Likely) | 4 (High) | 4 (High) | 0.725 | 7.250 | 0.830 |
| **44** | 3 (Even) | 3 (Medium) | 3 (Significant) | 0.500 | 5.000 | 0.640 |
| **45** | 3 (Even) | 5 (Catastrophic) | 4 (High) | 0.500 | 8.750 | 0.830 |
| **46** | 2 (Unlikely) | 2 (Little) | 1 (Low) | 0.275 | 2.750 | 0.165 |
| **47** | 2 (Unlikely) | 5 (Catastrophic) | 4 (High) | 0.275 | 8.750 | 0.830 |
| **48** | 4 (Likely) | 4 (High) | 4 (High) | 0.725 | 7.250 | 0.830 |
| **49** | 4 (Likely) | 2 (Little) | 3 (Significant) | 0.725 | 2.750 | 0.640 |
| **50** | 5 (Very Likely) | 4 (High) | 4 (High) | 0.875 | 7.250 | 0.830 |
| **51** | 5 (Very Likely) | 5 (Catastrophic) | 4 (High) | 0.875 | 8.750 | 0.830 |

**Available Data for Critical Variable Declared Public in Database**

| **No.** | **Numerical value** | | | **Coded linguistic variable** | | |
| --- | --- | --- | --- | --- | --- | --- |
| **Probability** | **Severity** | **Security Risk** | **Probability** | **Severity** | **Security Risk** |
| **1** | 3 (Even) | 5 (Catastrophic) | 4 (High) | 0.500 | 8.750 | 0.830 |
| **2** | 4 (Likely) | 4 (High) | 4 (High) | 0.725 | 7.250 | 0.830 |
| **3** | 3 (Even) | 4 (High) | 4 (High) | 0.500 | 7.250 | 0.830 |
| **4** | 1 (Very Unlikely) | 4 (High) | 3 (Significant) | 0.125 | 7.250 | 0.640 |
| **5** | 3 (Even) | 4 (High) | 4 | 0.500 | 7.250 | 0.830 |
| **6** | 3 (Even) | 2 (Little) | 2 (Medium) | 0.500 | 2.750 | 0.355 |
| **7** | 4 (Very Likely) | 5 (Catastrophic) | 4 (High) | 0.725 | 8.750 | 0.830 |
| **8** | 5 (Very Likely) | 3 (Medium) | 4 (High) | 0.875 | 5.000 | 0.830 |
| **9** | 3 (Even) | 3 (Medium) | 3 (Significant) | 0.500 | 5.000 | 0.640 |
| **10** | 3 (Even) | 5 (Catastrophic) | 4 (High) | 0.500 | 8.750 | 0.830 |
| **11** | 4 (Likely) | 4 (High) | 4 (High) | 0.725 | 7.250 | 0.830 |
| **12** | 3 (Even) | 4 (High) | 4 (High) | 0.500 | 7.250 | 0.830 |
| **13** | 1 (Very Unlikely) | 4 (High) | 3 (Significant) | 0.125 | 7.250 | 0.640 |
| **14** | 3 (Even) | 4 (High) | 4 | 0.500 | 7.250 | 0.830 |
| **15** | 3 (Even) | 2 (Little) | 2 (Medium) | 0.500 | 2.750 | 0.355 |
| **16** | 4 (Very Likely) | 5 (Catastrophic) | 4 (High) | 0.725 | 8.750 | 0.830 |
| **17** | 5 (Very Likely) | 3 (Medium) | 4 (High) | 0.875 | 5.000 | 0.830 |
| **18** | 3 (Even) | 3 (Medium) | 3 (Significant) | 0.500 | 5.000 | 0.640 |
| **19** | 4 (Likely) | 4 (High) | 4 (High) | 0.725 | 7.250 | 0.830 |
| **20** | 4 (Likely) | 4 (High) | 4 (High) | 0.725 | 7.250 | 0.830 |
| **21** | 4 (Likely) | 4 (High) | 4 (High) | 0.725 | 7.250 | 0.830 |
| **22** | 5 (Very Likely) | 5 (Catastrophic) | 4 (High) | 0.875 | 8.750 | 0.830 |
| **23** | 5 (Very Likely) | 5 (Catastrophic) | 4 (High) | 0.875 | 8.750 | 0.830 |
| **24** | 4 (Likely) | 3 (Medium) | 3 (Significant) | 0.725 | 5.000 | 0.640 |
| **25** | 4 (Likely) | 4 (High) | 4 (High) | 0.725 | 7.250 | 0.830 |
| **26** | 3 (Even) | 5 (Catastrophic) | 4 (High) | 0.500 | 8.750 | 0.830 |
| **27** | 2 (Unlikely) | 1 (Very Little) | 1 (Low) | 0.275 | 1.250 | 0.165 |
| **28** | 3 (Even) | 3 (Medium) | 3 (Significant) | 0.500 | 5.000 | 0.640 |
| **29** | 4 (Likely) | 5 (Catastrophic) | 4 (High) | 0.725 | 8.750 | 0.830 |
| **30** | 4 (Likely) | 2 (Little) | 3 (Significant) | 0.725 | 2.750 | 0.640 |
| **31** | 3 (Even) | 5 (Catastrophic) | 4 (High) | 0.500 | 8.750 | 0.830 |
| **32** | 3 (Even) | 4 (High) | 4 (High) | 0.500 | 7.250 | 0.830 |
| **33** | 3 (Even) | 3 (Medium) | 3 (Significant) | 0.500 | 5.000 | 0.640 |
| **34** | 4 (Likely) | 2 (Little) | 3 (Significant) | 0.725 | 2.750 | 0.640 |
| **35** | 4 (Likely) | 3 (Medium) | 3 (Significant) | 0.725 | 5.000 | 0.640 |
| **36** | 5 (Very Likely) | 2 (Little) | 3 (Significant) | 0.875 | 2.750 | 0.640 |
| **37** | 4 (Likely) | 3 (Medium) | 3 (Significant) | 0.725 | 5.000 | 0.640 |
| **38** | 3 (Even) | 4 (High) | 4 (High) | 0.500 | 7.250 | 0.830 |
| **39** | 2 (Unlikely) | 1 (Very Little) | 1 (Low) | 0.275 | 1.250 | 0.165 |
| **40** | 1 (Very Unlikely) | 3 (Medium) | 2 (Medium) | 0.125 | 5.000 | 0.355 |
| **41** | 5 (Very Likely) | 2 (Little) | 3 (Significant) | 0.875 | 2.750 | 0.640 |
| **42** | 2 (Unlikely) | 2 (Little) | 1 (Low) | 0.275 | 2.750 | 0.165 |
| **43** | 4 (Likely) | 4 (High) | 4 (High) | 0.725 | 7.250 | 0.830 |
| **44** | 3 (Even) | 3 (Medium) | 3 (Significant) | 0.500 | 5.000 | 0.640 |
| **45** | 3 (Even) | 5 (Catastrophic) | 4 (High) | 0.500 | 8.750 | 0.830 |
| **46** | 2 (Unlikely) | 2 (Little) | 1 (Low) | 0.275 | 2.750 | 0.165 |
| **47** | 2 (Unlikely) | 5 (Catastrophic) | 4 (High) | 0.275 | 8.750 | 0.830 |
| **48** | 4 (Likely) | 4 (High) | 4 (High) | 0.725 | 7.250 | 0.830 |
| **49** | 4 (Likely) | 2 (Little) | 3 (Significant) | 0.725 | 2.750 | 0.640 |
| **50** | 5 (Very Likely) | 4 (High) | 4 (High) | 0.875 | 7.250 | 0.830 |
| **51** | 5 (Very Likely) | 5 (Catastrophic) | 4 (High) | 0.875 | 8.750 | 0.830 |

**Available Data for Unverified Password Change in Database**

| **No.** | **Numerical value** | | | **Coded linguistic variable** | | |
| --- | --- | --- | --- | --- | --- | --- |
| **Probability** | **Severity** | **Security Risk** | **Probability** | **Severity** | **Security Risk** |
| **1** | 5 (Very Likely) | 2 (Little) | 3 (Significant) | 0.875 | 2.750 | 0.640 |
| **2** | 2 (Unlikely) | 2 (Little) | 1 (Low) | 0.275 | 2.750 | 0.165 |
| **3** | 4 (Likely) | 4 (High) | 4 (High) | 0.725 | 7.250 | 0.830 |
| **4** | 3 (Even) | 3 (Medium) | 3 (Significant) | 0.500 | 5.000 | 0.640 |
| **5** | 3 (Even) | 5 (Catastrophic) | 4 (High) | 0.500 | 8.750 | 0.830 |
| **6** | 2 (Unlikely) | 2 (Little) | 1 (Low) | 0.275 | 2.750 | 0.165 |
| **7** | 2 (Unlikely) | 5 (Catastrophic) | 4 (High) | 0.275 | 8.750 | 0.830 |
| **8** | 4 (Likely) | 4 (High) | 4 (High) | 0.725 | 7.250 | 0.830 |
| **9** | 2 (Unlikely) | 4 (High) | 3 (Significant) | 0.275 | 7.250 | 0.640 |
| **10** | 3 (Even) | 5 (Catastrophic) | 4 (High) | 0.500 | 8.750 | 0.830 |
| **11** | 4 (Likely) | 4 (High) | 4 (High) | 0.725 | 7.250 | 0.830 |
| **12** | 3 (Even) | 4 (High) | 4 (High) | 0.500 | 7.250 | 0.830 |
| **13** | 1 (Very Unlikely) | 4 (High) | 3 (Significant) | 0.125 | 7.250 | 0.640 |
| **14** | 3 (Even) | 4 (High) | 4 | 0.500 | 7.250 | 0.830 |
| **15** | 3 (Even) | 2 (Little) | 2 (Medium) | 0.500 | 2.750 | 0.355 |
| **16** | 4 (Very Likely) | 5 (Catastrophic) | 4 (High) | 0.725 | 8.750 | 0.830 |
| **17** | 5 (Very Likely) | 3 (Medium) | 4 (High) | 0.875 | 5.000 | 0.830 |
| **18** | 3 (Even) | 3 (Medium) | 3 (Significant) | 0.500 | 5.000 | 0.640 |
| **19** | 4 (Likely) | 4 (High) | 4 (High) | 0.725 | 7.250 | 0.830 |
| **20** | 4 (Likely) | 4 (High) | 4 (High) | 0.725 | 7.250 | 0.830 |
| **21** | 4 (Likely) | 4 (High) | 4 (High) | 0.725 | 7.250 | 0.830 |
| **22** | 5 (Very Likely) | 5 (Catastrophic) | 4 (High) | 0.875 | 8.750 | 0.830 |
| **23** | 5 (Very Likely) | 5 (Catastrophic) | 4 (High) | 0.875 | 8.750 | 0.830 |
| **24** | 4 (Likely) | 3 (Medium) | 3 (Significant) | 0.725 | 5.000 | 0.640 |
| **25** | 4 (Likely) | 4 (High) | 4 (High) | 0.725 | 7.250 | 0.830 |
| **26** | 3 (Even) | 5 (Catastrophic) | 4 (High) | 0.500 | 8.750 | 0.830 |
| **27** | 2 (Unlikely) | 1 (Very Little) | 1 (Low) | 0.275 | 1.250 | 0.165 |
| **28** | 3 (Even) | 3 (Medium) | 3 (Significant) | 0.500 | 5.000 | 0.640 |
| **29** | 4 (Likely) | 5 (Catastrophic) | 4 (High) | 0.725 | 8.750 | 0.830 |
| **30** | 4 (Likely) | 2 (Little) | 3 (Significant) | 0.725 | 2.750 | 0.640 |
| **31** | 3 (Even) | 5 (Catastrophic) | 4 (High) | 0.500 | 8.750 | 0.830 |
| **32** | 3 (Even) | 4 (High) | 4 (High) | 0.500 | 7.250 | 0.830 |
| **33** | 3 (Even) | 3 (Medium) | 3 (Significant) | 0.500 | 5.000 | 0.640 |
| **34** | 4 (Likely) | 2 (Little) | 3 (Significant) | 0.725 | 2.750 | 0.640 |
| **35** | 4 (Likely) | 3 (Medium) | 3 (Significant) | 0.725 | 5.000 | 0.640 |
| **36** | 5 (Very Likely) | 2 (Little) | 3 (Significant) | 0.875 | 2.750 | 0.640 |
| **37** | 4 (Likely) | 3 (Medium) | 3 (Significant) | 0.725 | 5.000 | 0.640 |
| **38** | 3 (Even) | 4 (High) | 4 (High) | 0.500 | 7.250 | 0.830 |
| **39** | 2 (Unlikely) | 1 (Very Little) | 1 (Low) | 0.275 | 1.250 | 0.165 |
| **40** | 1 (Very Unlikely) | 3 (Medium) | 2 (Medium) | 0.125 | 5.000 | 0.355 |
| **41** | 5 (Very Likely) | 2 (Little) | 3 (Significant) | 0.875 | 2.750 | 0.640 |
| **42** | 2 (Unlikely) | 2 (Little) | 1 (Low) | 0.275 | 2.750 | 0.165 |
| **43** | 4 (Likely) | 4 (High) | 4 (High) | 0.725 | 7.250 | 0.830 |
| **44** | 3 (Even) | 3 (Medium) | 3 (Significant) | 0.500 | 5.000 | 0.640 |
| **45** | 3 (Even) | 5 (Catastrophic) | 4 (High) | 0.500 | 8.750 | 0.830 |
| **46** | 2 (Unlikely) | 2 (Little) | 1 (Low) | 0.275 | 2.750 | 0.165 |
| **47** | 2 (Unlikely) | 5 (Catastrophic) | 4 (High) | 0.275 | 8.750 | 0.830 |
| **48** | 4 (Likely) | 4 (High) | 4 (High) | 0.725 | 7.250 | 0.830 |
| **49** | 4 (Likely) | 2 (Little) | 3 (Significant) | 0.725 | 2.750 | 0.640 |
| **50** | 5 (Very Likely) | 4 (High) | 4 (High) | 0.875 | 7.250 | 0.830 |
| **51** | 5 (Very Likely) | 5 (Catastrophic) | 4 (High) | 0.875 | 8.750 | 0.830 |

**Available Data for Race Condition within a Thread in Database**

| **No.** | **Numerical value** | | | **Coded linguistic variable** | | |
| --- | --- | --- | --- | --- | --- | --- |
| **Probability** | **Severity** | **Security Risk** | **Probability** | **Severity** | **Security Risk** |
| **1** | 4 (Likely) | 4 (High) | 4 (High) | 0.725 | 7.250 | 0.830 |
| **2** | 3 (Even) | 5 (Catastrophic) | 4 (High) | 0.500 | 8.750 | 0.830 |
| **3** | 2 (Unlikely) | 1 (Very Little) | 1 (Low) | 0.275 | 1.250 | 0.165 |
| **4** | 3 (Even) | 3 (Medium) | 3 (Significant) | 0.500 | 5.000 | 0.640 |
| **5** | 4 (Likely) | 5 (Catastrophic) | 4 (High) | 0.725 | 8.750 | 0.830 |
| **6** | 4 (Likely) | 2 (Little) | 3 (Significant) | 0.725 | 2.750 | 0.640 |
| **7** | 3 (Even) | 5 (Catastrophic) | 4 (High) | 0.500 | 8.750 | 0.830 |
| **8** | 3 (Even) | 4 (High) | 4 (High) | 0.500 | 7.250 | 0.830 |
| **9** | 3 (Even) | 3 (Medium) | 3 (Significant) | 0.500 | 5.000 | 0.640 |
| **10** | 4 (Likely) | 2 (Little) | 3 (Significant) | 0.725 | 2.750 | 0.640 |
| **11** | 4 (Likely) | 3 (Medium) | 3 (Significant) | 0.725 | 5.000 | 0.640 |
| **12** | 4 (Likely) | 4 (High) | 4 (High) | 0.725 | 7.250 | 0.830 |
| **13** | 3 (Even) | 5 (Catastrophic) | 4 (High) | 0.500 | 8.750 | 0.830 |
| **14** | 2 (Unlikely) | 1 (Very Little) | 1 (Low) | 0.275 | 1.250 | 0.165 |
| **15** | 3 (Even) | 3 (Medium) | 3 (Significant) | 0.500 | 5.000 | 0.640 |
| **16** | 4 (Very Likely) | 5 (Catastrophic) | 4 (High) | 0.725 | 8.750 | 0.830 |
| **17** | 5 (Very Likely) | 3 (Medium) | 4 (High) | 0.875 | 5.000 | 0.830 |
| **18** | 3 (Even) | 3 (Medium) | 3 (Significant) | 0.500 | 5.000 | 0.640 |
| **19** | 4 (Likely) | 4 (High) | 4 (High) | 0.725 | 7.250 | 0.830 |
| **20** | 4 (Likely) | 4 (High) | 4 (High) | 0.725 | 7.250 | 0.830 |
| **21** | 4 (Likely) | 4 (High) | 4 (High) | 0.725 | 7.250 | 0.830 |
| **22** | 5 (Very Likely) | 5 (Catastrophic) | 4 (High) | 0.875 | 8.750 | 0.830 |
| **23** | 5 (Very Likely) | 5 (Catastrophic) | 4 (High) | 0.875 | 8.750 | 0.830 |
| **24** | 4 (Likely) | 3 (Medium) | 3 (Significant) | 0.725 | 5.000 | 0.640 |
| **25** | 4 (Likely) | 4 (High) | 4 (High) | 0.725 | 7.250 | 0.830 |
| **26** | 3 (Even) | 5 (Catastrophic) | 4 (High) | 0.500 | 8.750 | 0.830 |
| **27** | 2 (Unlikely) | 1 (Very Little) | 1 (Low) | 0.275 | 1.250 | 0.165 |
| **28** | 3 (Even) | 3 (Medium) | 3 (Significant) | 0.500 | 5.000 | 0.640 |
| **29** | 4 (Likely) | 5 (Catastrophic) | 4 (High) | 0.725 | 8.750 | 0.830 |
| **30** | 4 (Likely) | 2 (Little) | 3 (Significant) | 0.725 | 2.750 | 0.640 |
| **31** | 3 (Even) | 5 (Catastrophic) | 4 (High) | 0.500 | 8.750 | 0.830 |
| **32** | 3 (Even) | 4 (High) | 4 (High) | 0.500 | 7.250 | 0.830 |
| **33** | 3 (Even) | 3 (Medium) | 3 (Significant) | 0.500 | 5.000 | 0.640 |
| **34** | 4 (Likely) | 2 (Little) | 3 (Significant) | 0.725 | 2.750 | 0.640 |
| **35** | 4 (Likely) | 3 (Medium) | 3 (Significant) | 0.725 | 5.000 | 0.640 |
| **36** | 5 (Very Likely) | 2 (Little) | 3 (Significant) | 0.875 | 2.750 | 0.640 |
| **37** | 4 (Likely) | 3 (Medium) | 3 (Significant) | 0.725 | 5.000 | 0.640 |
| **38** | 3 (Even) | 4 (High) | 4 (High) | 0.500 | 7.250 | 0.830 |
| **39** | 2 (Unlikely) | 1 (Very Little) | 1 (Low) | 0.275 | 1.250 | 0.165 |
| **40** | 1 (Very Unlikely) | 3 (Medium) | 2 (Medium) | 0.125 | 5.000 | 0.355 |
| **41** | 5 (Very Likely) | 2 (Little) | 3 (Significant) | 0.875 | 2.750 | 0.640 |
| **42** | 2 (Unlikely) | 2 (Little) | 1 (Low) | 0.275 | 2.750 | 0.165 |
| **43** | 4 (Likely) | 4 (High) | 4 (High) | 0.725 | 7.250 | 0.830 |
| **44** | 3 (Even) | 3 (Medium) | 3 (Significant) | 0.500 | 5.000 | 0.640 |
| **45** | 3 (Even) | 5 (Catastrophic) | 4 (High) | 0.500 | 8.750 | 0.830 |
| **46** | 2 (Unlikely) | 2 (Little) | 1 (Low) | 0.275 | 2.750 | 0.165 |
| **47** | 2 (Unlikely) | 5 (Catastrophic) | 4 (High) | 0.275 | 8.750 | 0.830 |
| **48** | 4 (Likely) | 4 (High) | 4 (High) | 0.725 | 7.250 | 0.830 |
| **49** | 4 (Likely) | 2 (Little) | 3 (Significant) | 0.725 | 2.750 | 0.640 |
| **50** | 5 (Very Likely) | 4 (High) | 4 (High) | 0.875 | 7.250 | 0.830 |
| **51** | 5 (Very Likely) | 5 (Catastrophic) | 4 (High) | 0.875 | 8.750 | 0.830 |

**Available Data for Untrusted Search Path in Database**

| **No.** | **Numerical value** | | | **Coded linguistic variable** | | |
| --- | --- | --- | --- | --- | --- | --- |
| **Probability** | **Severity** | **Security Risk** | **Probability** | **Severity** | **Security Risk** |
| **1** | 3 (Even) | 3 (Medium) | 3 (Significant) | 0.500 | 5.000 | 0.640 |
| **2** | 2 (Unlikely) | 3 (Medium) | 2 (Medium) | 0.275 | 5.000 | 0.355 |
| **3** | 2(Unlikely) | 2 (Little) | 1 (Low) | 0.275 | 2.750 | 0.165 |
| **4** | 3 (Even) | 2 (Little) | 2 (Medium) | 0.500 | 2.750 | 0.355 |
| **5** | 4 (Likely) | 3 (Medium) | 3 (Significant) | 0.725 | 5.000 | 0.640 |
| **6** | 3 (Even) | 2 (Little) | 2 (Medium) | 0.500 | 2.750 | 0.355 |
| **7** | 1 (Very Unlikely) | 1 (Very Little) | 1 (Low) | 0.125 | 1.250 | 0.165 |
| **8** | 3 (Even) | 2 (Little) | 2 (Medium) | 0.500 | 2.750 | 0.355 |
| **9** | 2 (Unlikely) | 4 (High) | 3 (Significant) | 0.275 | 7.250 | 0.640 |
| **10** | 3 (Even) | 5 (Catastrophic) | 4 (High) | 0.500 | 8.750 | 0.830 |
| **11** | 4 (Likely) | 4 (High) | 4 (High) | 0.725 | 7.250 | 0.830 |
| **12** | 3 (Even) | 4 (High) | 4 (High) | 0.500 | 7.250 | 0.830 |
| **13** | 1 (Very Unlikely) | 4 (High) | 3 (Significant) | 0.125 | 7.250 | 0.640 |
| **14** | 3 (Even) | 4 (High) | 4 | 0.500 | 7.250 | 0.830 |
| **15** | 3 (Even) | 2 (Little) | 2 (Medium) | 0.500 | 2.750 | 0.355 |
| **16** | 4 (Very Likely) | 5 (Catastrophic) | 4 (High) | 0.725 | 8.750 | 0.830 |
| **17** | 5 (Very Likely) | 3 (Medium) | 4 (High) | 0.875 | 5.000 | 0.830 |
| **18** | 3 (Even) | 3 (Medium) | 3 (Significant) | 0.500 | 5.000 | 0.640 |
| **19** | 4 (Likely) | 4 (High) | 4 (High) | 0.725 | 7.250 | 0.830 |
| **20** | 4 (Likely) | 4 (High) | 4 (High) | 0.725 | 7.250 | 0.830 |
| **21** | 4 (Likely) | 4 (High) | 4 (High) | 0.725 | 7.250 | 0.830 |
| **22** | 5 (Very Likely) | 5 (Catastrophic) | 4 (High) | 0.875 | 8.750 | 0.830 |
| **23** | 5 (Very Likely) | 5 (Catastrophic) | 4 (High) | 0.875 | 8.750 | 0.830 |
| **24** | 4 (Likely) | 3 (Medium) | 3 (Significant) | 0.725 | 5.000 | 0.640 |
| **25** | 4 (Likely) | 4 (High) | 4 (High) | 0.725 | 7.250 | 0.830 |
| **26** | 3 (Even) | 5 (Catastrophic) | 4 (High) | 0.500 | 8.750 | 0.830 |
| **27** | 2 (Unlikely) | 1 (Very Little) | 1 (Low) | 0.275 | 1.250 | 0.165 |
| **28** | 3 (Even) | 3 (Medium) | 3 (Significant) | 0.500 | 5.000 | 0.640 |
| **29** | 4 (Likely) | 5 (Catastrophic) | 4 (High) | 0.725 | 8.750 | 0.830 |
| **30** | 4 (Likely) | 2 (Little) | 3 (Significant) | 0.725 | 2.750 | 0.640 |
| **31** | 3 (Even) | 5 (Catastrophic) | 4 (High) | 0.500 | 8.750 | 0.830 |
| **32** | 3 (Even) | 4 (High) | 4 (High) | 0.500 | 7.250 | 0.830 |
| **33** | 3 (Even) | 3 (Medium) | 3 (Significant) | 0.500 | 5.000 | 0.640 |
| **34** | 4 (Likely) | 2 (Little) | 3 (Significant) | 0.725 | 2.750 | 0.640 |
| **35** | 4 (Likely) | 3 (Medium) | 3 (Significant) | 0.725 | 5.000 | 0.640 |
| **36** | 5 (Very Likely) | 2 (Little) | 3 (Significant) | 0.875 | 2.750 | 0.640 |
| **37** | 4 (Likely) | 3 (Medium) | 3 (Significant) | 0.725 | 5.000 | 0.640 |
| **38** | 3 (Even) | 4 (High) | 4 (High) | 0.500 | 7.250 | 0.830 |
| **39** | 2 (Unlikely) | 1 (Very Little) | 1 (Low) | 0.275 | 1.250 | 0.165 |
| **40** | 1 (Very Unlikely) | 3 (Medium) | 2 (Medium) | 0.125 | 5.000 | 0.355 |
| **41** | 5 (Very Likely) | 2 (Little) | 3 (Significant) | 0.875 | 2.750 | 0.640 |
| **42** | 2 (Unlikely) | 2 (Little) | 1 (Low) | 0.275 | 2.750 | 0.165 |
| **43** | 4 (Likely) | 4 (High) | 4 (High) | 0.725 | 7.250 | 0.830 |
| **44** | 3 (Even) | 3 (Medium) | 3 (Significant) | 0.500 | 5.000 | 0.640 |
| **45** | 3 (Even) | 5 (Catastrophic) | 4 (High) | 0.500 | 8.750 | 0.830 |
| **46** | 2 (Unlikely) | 2 (Little) | 1 (Low) | 0.275 | 2.750 | 0.165 |
| **47** | 2 (Unlikely) | 5 (Catastrophic) | 4 (High) | 0.275 | 8.750 | 0.830 |
| **48** | 4 (Likely) | 4 (High) | 4 (High) | 0.725 | 7.250 | 0.830 |
| **49** | 4 (Likely) | 2 (Little) | 3 (Significant) | 0.725 | 2.750 | 0.640 |
| **50** | 5 (Very Likely) | 4 (High) | 4 (High) | 0.875 | 7.250 | 0.830 |
| **51** | 5 (Very Likely) | 5 (Catastrophic) | 4 (High) | 0.875 | 8.750 | 0.830 |

**Available Data for Download of Code without Integrity Check in Database**

| **No.** | **Numerical value** | | | **Coded linguistic variable** | | |
| --- | --- | --- | --- | --- | --- | --- |
| **Probability** | **Severity** | **Security Risk** | **Probability** | **Severity** | **Security Risk** |
| **1** | 1 (Very Unlikely) | 4 (High) | 3 (Significant) | 0.125 | 7.250 | 0.640 |
| **2** | 3 (Even) | 4 (High) | 4 | 0.500 | 7.250 | 0.830 |
| **3** | 3 (Even) | 2 (Little) | 2 (Medium) | 0.500 | 2.750 | 0.355 |
| **4** | 4 (Very Likely) | 5 (Catastrophic) | 4 (High) | 0.725 | 8.750 | 0.830 |
| **5** | 5 (Very Likely) | 3 (Medium) | 4 (High) | 0.875 | 5.000 | 0.830 |
| **6** | 3 (Even) | 3 (Medium) | 3 (Significant) | 0.500 | 5.000 | 0.640 |
| **7** | 4 (Likely) | 4 (High) | 4 (High) | 0.725 | 7.250 | 0.830 |
| **8** | 4 (Likely) | 4 (High) | 4 (High) | 0.725 | 7.250 | 0.830 |
| **9** | 4 (Likely) | 4 (High) | 4 (High) | 0.725 | 7.250 | 0.830 |
| **10** | 5 (Very Likely) | 5 (Catastrophic) | 4 (High) | 0.875 | 8.750 | 0.830 |
| **11** | 5 (Very Likely) | 5 (Catastrophic) | 4 (High) | 0.875 | 8.750 | 0.830 |
| **12** | 4 (Likely) | 3 (Medium) | 3 (Significant) | 0.725 | 5.000 | 0.640 |
| **13** | 1 (Very Unlikely) | 4 (High) | 3 (Significant) | 0.125 | 7.250 | 0.640 |
| **14** | 3 (Even) | 4 (High) | 4 | 0.500 | 7.250 | 0.830 |
| **15** | 3 (Even) | 2 (Little) | 2 (Medium) | 0.500 | 2.750 | 0.355 |
| **16** | 4 (Very Likely) | 5 (Catastrophic) | 4 (High) | 0.725 | 8.750 | 0.830 |
| **17** | 5 (Very Likely) | 3 (Medium) | 4 (High) | 0.875 | 5.000 | 0.830 |
| **18** | 3 (Even) | 3 (Medium) | 3 (Significant) | 0.500 | 5.000 | 0.640 |
| **19** | 4 (Likely) | 4 (High) | 4 (High) | 0.725 | 7.250 | 0.830 |
| **20** | 4 (Likely) | 4 (High) | 4 (High) | 0.725 | 7.250 | 0.830 |
| **21** | 4 (Likely) | 4 (High) | 4 (High) | 0.725 | 7.250 | 0.830 |
| **22** | 5 (Very Likely) | 5 (Catastrophic) | 4 (High) | 0.875 | 8.750 | 0.830 |
| **23** | 5 (Very Likely) | 5 (Catastrophic) | 4 (High) | 0.875 | 8.750 | 0.830 |
| **24** | 4 (Likely) | 3 (Medium) | 3 (Significant) | 0.725 | 5.000 | 0.640 |
| **25** | 4 (Likely) | 4 (High) | 4 (High) | 0.725 | 7.250 | 0.830 |
| **26** | 3 (Even) | 5 (Catastrophic) | 4 (High) | 0.500 | 8.750 | 0.830 |
| **27** | 2 (Unlikely) | 1 (Very Little) | 1 (Low) | 0.275 | 1.250 | 0.165 |
| **28** | 3 (Even) | 3 (Medium) | 3 (Significant) | 0.500 | 5.000 | 0.640 |
| **29** | 4 (Likely) | 5 (Catastrophic) | 4 (High) | 0.725 | 8.750 | 0.830 |
| **30** | 4 (Likely) | 2 (Little) | 3 (Significant) | 0.725 | 2.750 | 0.640 |
| **31** | 3 (Even) | 5 (Catastrophic) | 4 (High) | 0.500 | 8.750 | 0.830 |
| **32** | 3 (Even) | 4 (High) | 4 (High) | 0.500 | 7.250 | 0.830 |
| **33** | 3 (Even) | 3 (Medium) | 3 (Significant) | 0.500 | 5.000 | 0.640 |
| **34** | 4 (Likely) | 2 (Little) | 3 (Significant) | 0.725 | 2.750 | 0.640 |
| **35** | 4 (Likely) | 3 (Medium) | 3 (Significant) | 0.725 | 5.000 | 0.640 |
| **36** | 5 (Very Likely) | 2 (Little) | 3 (Significant) | 0.875 | 2.750 | 0.640 |
| **37** | 4 (Likely) | 3 (Medium) | 3 (Significant) | 0.725 | 5.000 | 0.640 |
| **38** | 3 (Even) | 4 (High) | 4 (High) | 0.500 | 7.250 | 0.830 |
| **39** | 2 (Unlikely) | 1 (Very Little) | 1 (Low) | 0.275 | 1.250 | 0.165 |
| **40** | 1 (Very Unlikely) | 3 (Medium) | 2 (Medium) | 0.125 | 5.000 | 0.355 |
| **41** | 5 (Very Likely) | 2 (Little) | 3 (Significant) | 0.875 | 2.750 | 0.640 |
| **42** | 2 (Unlikely) | 2 (Little) | 1 (Low) | 0.275 | 2.750 | 0.165 |
| **43** | 4 (Likely) | 4 (High) | 4 (High) | 0.725 | 7.250 | 0.830 |
| **44** | 3 (Even) | 3 (Medium) | 3 (Significant) | 0.500 | 5.000 | 0.640 |
| **45** | 3 (Even) | 5 (Catastrophic) | 4 (High) | 0.500 | 8.750 | 0.830 |
| **46** | 2 (Unlikely) | 2 (Little) | 1 (Low) | 0.275 | 2.750 | 0.165 |
| **47** | 2 (Unlikely) | 5 (Catastrophic) | 4 (High) | 0.275 | 8.750 | 0.830 |
| **48** | 4 (Likely) | 4 (High) | 4 (High) | 0.725 | 7.250 | 0.830 |
| **49** | 4 (Likely) | 2 (Little) | 3 (Significant) | 0.725 | 2.750 | 0.640 |
| **50** | 5 (Very Likely) | 4 (High) | 4 (High) | 0.875 | 7.250 | 0.830 |
| **51** | 5 (Very Likely) | 5 (Catastrophic) | 4 (High) | 0.875 | 8.750 | 0.830 |

**Available Data for External Initialization of Trusted Variables or Data Stores in Database**

| **No.** | **Numerical value** | | | **Coded linguistic variable** | | |
| --- | --- | --- | --- | --- | --- | --- |
| **Probability** | **Severity** | **Security Risk** | **Probability** | **Severity** | **Security Risk** |
| **1** | 4 (Very Likely) | 5 (Catastrophic) | 4 (High) | 0.725 | 8.750 | 0.830 |
| **2** | 5 (Very Likely) | 3 (Medium) | 4 (High) | 0.875 | 5.000 | 0.830 |
| **3** | 3 (Even) | 3 (Medium) | 3 (Significant) | 0.500 | 5.000 | 0.640 |
| **4** | 4 (Likely) | 4 (High) | 4 (High) | 0.725 | 7.250 | 0.830 |
| **5** | 4 (Likely) | 4 (High) | 4 (High) | 0.725 | 7.250 | 0.830 |
| **6** | 4 (Likely) | 4 (High) | 4 (High) | 0.725 | 7.250 | 0.830 |
| **7** | 5 (Very Likely) | 5 (Catastrophic) | 4 (High) | 0.875 | 8.750 | 0.830 |
| **8** | 5 (Very Likely) | 5 (Catastrophic) | 4 (High) | 0.875 | 8.750 | 0.830 |
| **9** | 4 (Likely) | 3 (Medium) | 3 (Significant) | 0.725 | 5.000 | 0.640 |
| **10** | 4 (Likely) | 4 (High) | 4 (High) | 0.725 | 7.250 | 0.830 |
| **11** | 3 (Even) | 5 (Catastrophic) | 4 (High) | 0.500 | 8.750 | 0.830 |
| **12** | 2 (Unlikely) | 1 (Very Little) | 1 (Low) | 0.275 | 1.250 | 0.165 |
| **13** | 3 (Even) | 3 (Medium) | 3 (Significant) | 0.500 | 5.000 | 0.640 |
| **14** | 3 (Even) | 4 (High) | 4 | 0.500 | 7.250 | 0.830 |
| **15** | 3 (Even) | 2 (Little) | 2 (Medium) | 0.500 | 2.750 | 0.355 |
| **16** | 4 (Very Likely) | 5 (Catastrophic) | 4 (High) | 0.725 | 8.750 | 0.830 |
| **17** | 5 (Very Likely) | 3 (Medium) | 4 (High) | 0.875 | 5.000 | 0.830 |
| **18** | 3 (Even) | 3 (Medium) | 3 (Significant) | 0.500 | 5.000 | 0.640 |
| **19** | 4 (Likely) | 4 (High) | 4 (High) | 0.725 | 7.250 | 0.830 |
| **20** | 4 (Likely) | 4 (High) | 4 (High) | 0.725 | 7.250 | 0.830 |
| **21** | 4 (Likely) | 4 (High) | 4 (High) | 0.725 | 7.250 | 0.830 |
| **22** | 5 (Very Likely) | 5 (Catastrophic) | 4 (High) | 0.875 | 8.750 | 0.830 |
| **23** | 5 (Very Likely) | 5 (Catastrophic) | 4 (High) | 0.875 | 8.750 | 0.830 |
| **24** | 4 (Likely) | 3 (Medium) | 3 (Significant) | 0.725 | 5.000 | 0.640 |
| **25** | 4 (Likely) | 4 (High) | 4 (High) | 0.725 | 7.250 | 0.830 |
| **26** | 3 (Even) | 5 (Catastrophic) | 4 (High) | 0.500 | 8.750 | 0.830 |
| **27** | 2 (Unlikely) | 1 (Very Little) | 1 (Low) | 0.275 | 1.250 | 0.165 |
| **28** | 3 (Even) | 3 (Medium) | 3 (Significant) | 0.500 | 5.000 | 0.640 |
| **29** | 4 (Likely) | 5 (Catastrophic) | 4 (High) | 0.725 | 8.750 | 0.830 |
| **30** | 4 (Likely) | 2 (Little) | 3 (Significant) | 0.725 | 2.750 | 0.640 |
| **31** | 3 (Even) | 5 (Catastrophic) | 4 (High) | 0.500 | 8.750 | 0.830 |
| **32** | 3 (Even) | 4 (High) | 4 (High) | 0.500 | 7.250 | 0.830 |
| **33** | 3 (Even) | 3 (Medium) | 3 (Significant) | 0.500 | 5.000 | 0.640 |
| **34** | 4 (Likely) | 2 (Little) | 3 (Significant) | 0.725 | 2.750 | 0.640 |
| **35** | 4 (Likely) | 3 (Medium) | 3 (Significant) | 0.725 | 5.000 | 0.640 |
| **36** | 5 (Very Likely) | 2 (Little) | 3 (Significant) | 0.875 | 2.750 | 0.640 |
| **37** | 4 (Likely) | 3 (Medium) | 3 (Significant) | 0.725 | 5.000 | 0.640 |
| **38** | 3 (Even) | 4 (High) | 4 (High) | 0.500 | 7.250 | 0.830 |
| **39** | 2 (Unlikely) | 1 (Very Little) | 1 (Low) | 0.275 | 1.250 | 0.165 |
| **40** | 1 (Very Unlikely) | 3 (Medium) | 2 (Medium) | 0.125 | 5.000 | 0.355 |
| **41** | 5 (Very Likely) | 2 (Little) | 3 (Significant) | 0.875 | 2.750 | 0.640 |
| **42** | 2 (Unlikely) | 2 (Little) | 1 (Low) | 0.275 | 2.750 | 0.165 |
| **43** | 4 (Likely) | 4 (High) | 4 (High) | 0.725 | 7.250 | 0.830 |
| **44** | 3 (Even) | 3 (Medium) | 3 (Significant) | 0.500 | 5.000 | 0.640 |
| **45** | 3 (Even) | 5 (Catastrophic) | 4 (High) | 0.500 | 8.750 | 0.830 |
| **46** | 2 (Unlikely) | 2 (Little) | 1 (Low) | 0.275 | 2.750 | 0.165 |
| **47** | 2 (Unlikely) | 5 (Catastrophic) | 4 (High) | 0.275 | 8.750 | 0.830 |
| **48** | 4 (Likely) | 4 (High) | 4 (High) | 0.725 | 7.250 | 0.830 |
| **49** | 4 (Likely) | 2 (Little) | 3 (Significant) | 0.725 | 2.750 | 0.640 |
| **50** | 5 (Very Likely) | 4 (High) | 4 (High) | 0.875 | 7.250 | 0.830 |
| **51** | 5 (Very Likely) | 5 (Catastrophic) | 4 (High) | 0.875 | 8.750 | 0.830 |
